# Supplementary material for: Proteomic atlas of organ vasculopathies triggered by Staphylococcus aureus sepsis
Source: PubMed Central journal article supplement (PMC6789120; doi:10.1038/s41467-019-12672-x), 2019-10-11
Supplement: 41467_2019_12672_MOESM1_ESM.pdf [file 41467_2019_12672_MOESM1_ESM.pdf]

**Supplementary Information for:**

**“Proteomic atlas of organ vasculopathies triggered by *Staphylococcus aureus* sepsis”**

Alejandro Gómez Toledo et al

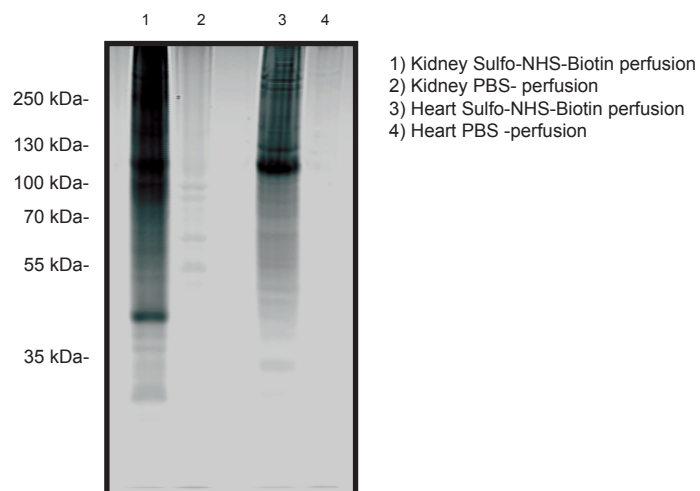

**Supplementary Figure 1. Western blotting analysis of organ lysates derived from systemically biotinylated mice.** Kidney and heart tissues from animals subjected to perfusion with sulfo-NHS-biotin were homogenized and resolved by SDS-PAGE. Protein signals were detected by incubating with a streptavidin probe conjugated to an infrared dye. Strong streptavidin reactivity was detected in the biotinylated samples (lanes 1 and 3). Only faint signals were observed in control tissue derived from animals perfused with PBS (lanes 2 and 4).



a

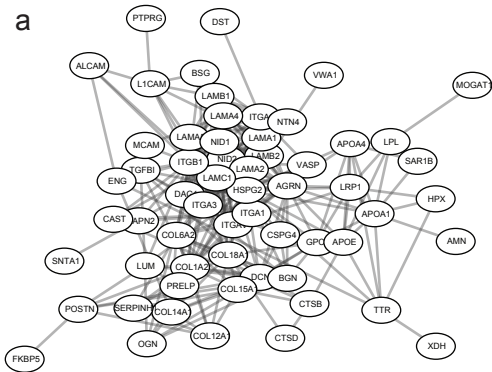

### Kidney

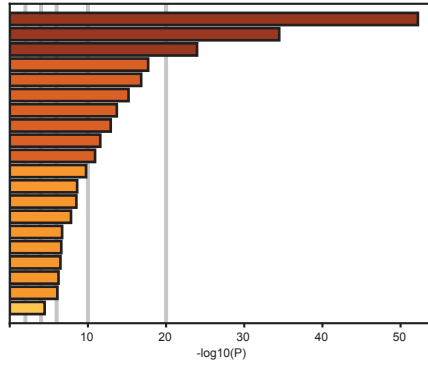

GO:0043062: extracellular structure organization  
 R-HSA-3000157: Laminin interactions  
 R-HSA-1474228: Degradation of the extracellular matrix  
 R-HSA-216083: Integrin cell surface interactions  
 GO:0000904: cell morphogenesis involved in differentiation  
 R-HSA-3550782: Diseases associated with glycosaminoglycan  
 R-HSA-1474290: Collagen formation  
 R-HSA-975634: Retinoid metabolism and transport  
 GO:0001568: blood vessel development  
 M53: PID INTEGRIN3 PATHWAY  
 CORUM:2318: ITGA6-ITGB4-Laminin10/12 complex  
 GO:0034371: chylomicron remodeling  
 GO:0048729: tissue morphogenesis  
 CORUM:2398: ITGA3-ITB1-BSG complex  
 GO:0071711: basement membrane organization  
 GO:0032963: collagen metabolic process  
 GO:0007369: gastrulation  
 R-HSA-3000170: Syndecan interactions  
 R-HSA-3656225: Defective CHST6 causes MCDC1  
 GO:0009611: response to wounding

b

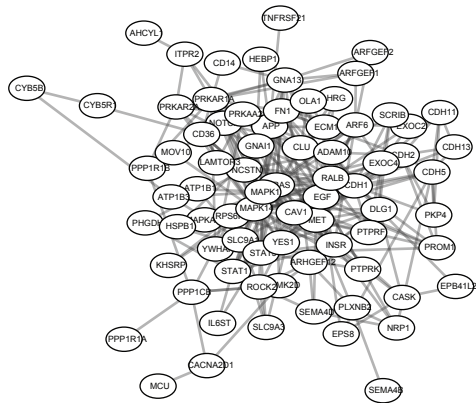

### Kidney

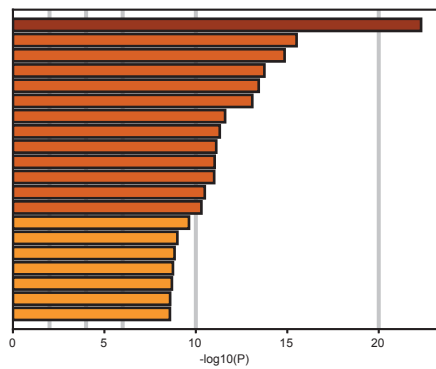

R-HSA-9006934: Signaling by Receptor Tyrosine Kinases  
 R-HSA-109582: Hemostasis  
 GO:0030155: regulation of cell adhesion  
 GO:0034330: cell junction organization  
 GO:0030335: positive regulation of cell migration  
 hsa05205: Proteoglycans in cancer  
 M142: PID AJDIS2 2PATHWAY  
 GO:1903827: regulation of cellular protein localization  
 GO:1901699: cellular response to nitrogen compound  
 hsa04360: Axon guidance  
 GO:1990778: protein localization to cell periphery  
 hsa04261: Adrenergic signaling in cardiomyocytes  
 M164: PID ERBB1 DOWNSTREAM PATHWAY  
 GO:0009811: response to wounding  
 GO:0007265: Ras protein signal transduction  
 hsa04921: Oxytocin signaling pathway  
 GO:0001568: blood vessel development  
 GO:0045859: regulation of protein kinase activity  
 hsa04022: cGMP-PKG signaling pathway  
 GO:0032970: regulation of actin filament-based process

c

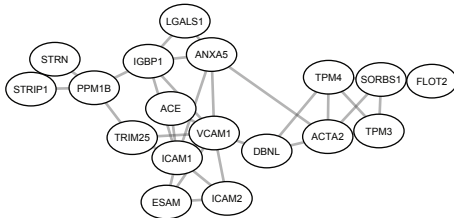

### Kidney

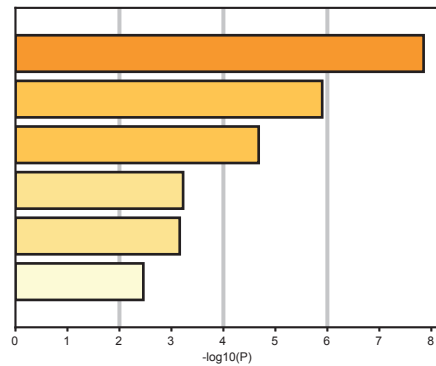

R-HSA-445355: Smooth Muscle Contraction  
 M169: PID INTEGRIN2 PATHWAY  
 GO:0042310: vasoconstriction  
 GO:0043122: regulation of I-kappaB kinase/NF-kappaB signaling  
 GO:0034329: cell junction assembly  
 GO:0043434: response to peptide hormone

d

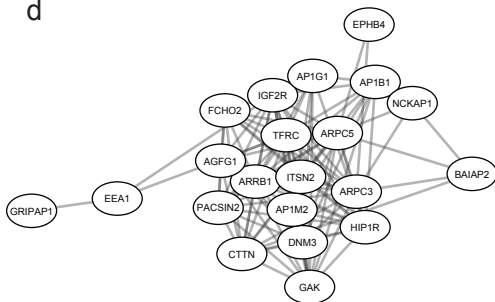

### Kidney

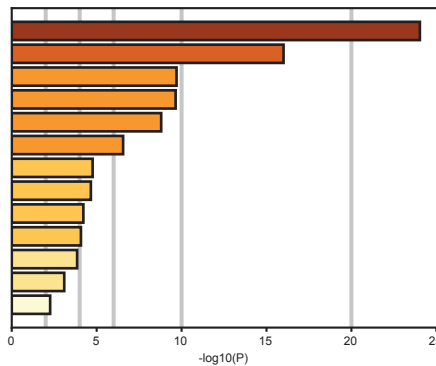

R-HSA-8856828: Clathrin-mediated endocytosis  
 R-HSA-43272: Golgi Associated Vesicle Biogenesis  
 GO:0030838: positive regulation of actin filament polymerization  
 R-HSA-8856825: Cargo recognition for clathrin-mediated endocytosis  
 hsa04144: Endocytosis  
 GO:0036465: synaptic vesicle recycling  
 GO:0010256: endomembrane system organization  
 GO:0060627: regulation of vesicle-mediated transport  
 GO:0006892: post-Golgi vesicle-mediated transport  
 GO:0016050: vesicle organization  
 GO:0050807: regulation of synapse organization  
 GO:0001558: regulation of cell growth



i

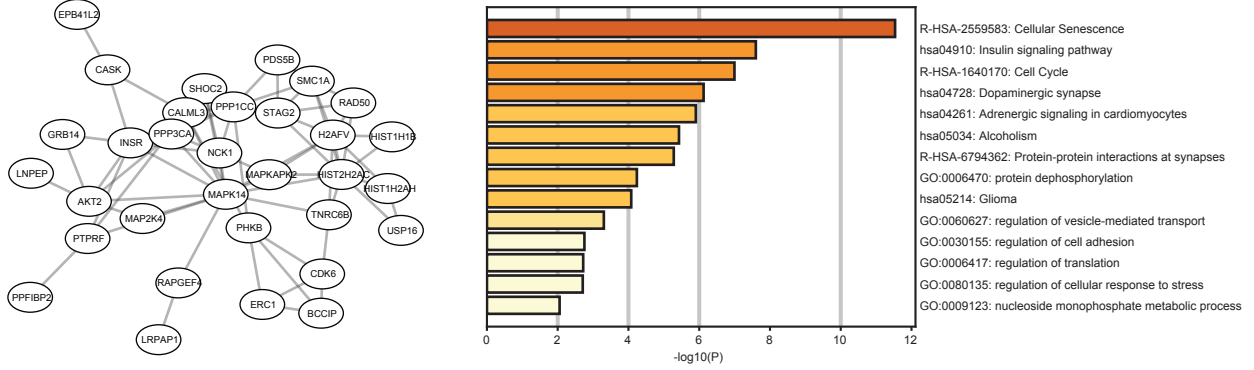

**Supplementary Figure 2. Network analysis of systemically biotinylated proteins from liver and kidney tissues.** Proteins identified through proteomics analysis were used to generate a protein-protein association network through the STRING database. Protein interactions were limited to high confidence physical or functional associations (association score > 0.7). The final network was subjected to Louvain clustering to identify highly interconnected communities. The identified clusters were further segregated via force-directed visualization algorithms and subjected to functional enrichment analysis using the web-based version of Metascape. Kidney proteins were clustered into 5 different communities (a-e) whereas liver samples were segregated into 4 different cluster (f-i). Some of these clusters were enriched in specific functions and organ specific biological pathways

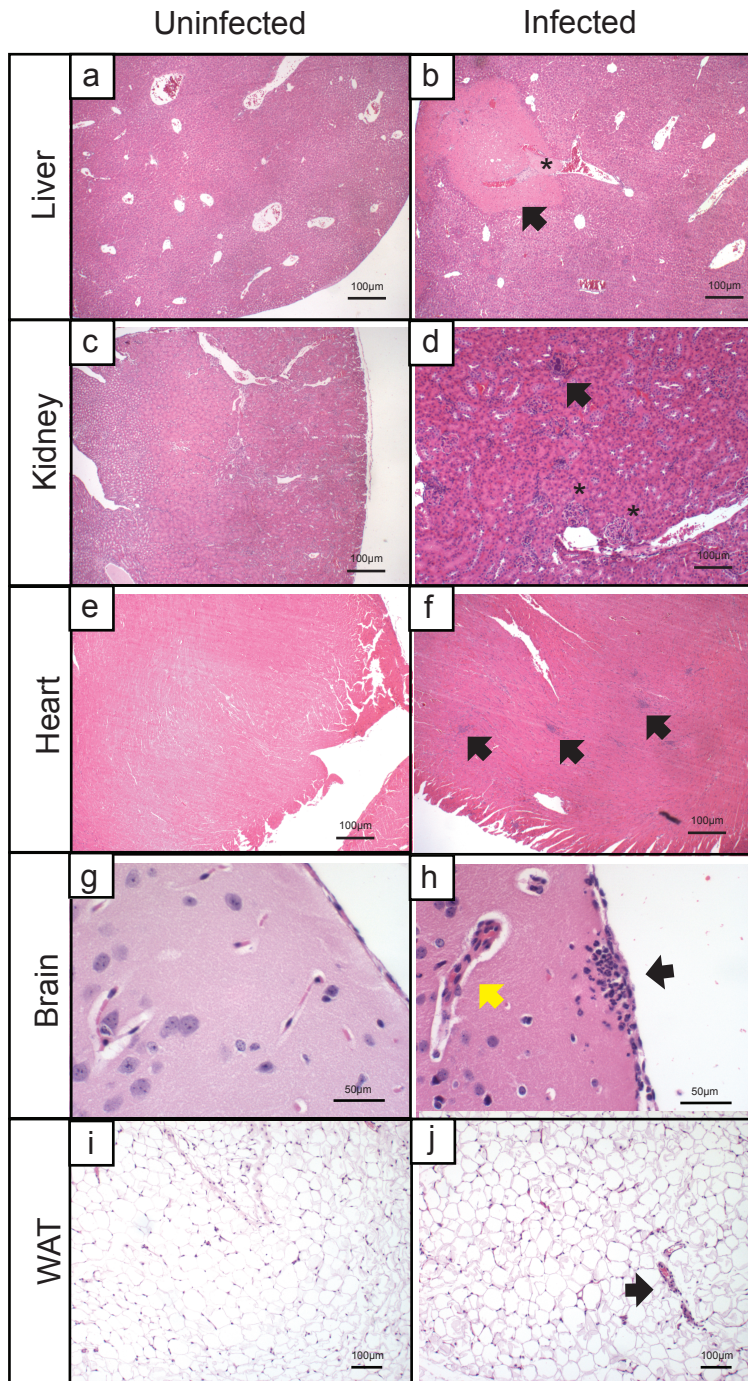

**Supplementary Figure 3. Histological analysis of organ pathologies triggered by MRSA-sepsis.** Representative hematoxylin and eosin (H&E) stained tissue slides derived from septic animals at 24 hr post-MRSA infection and uninfected controls, reveal multiple signs of inflammation, vasculopathy and bacterial colonization. Liver tissues (a-b) consistently displayed areas of extensive necrosis (black arrow) in the vicinity of large thrombi (asterisk). Signs of leukocyte infiltration and glomerular inflammation (arrows) were observed in the kidney (c-d) together with bacterial outbreaks (arrow). Heart tissues (e-f) showed the presence of multiple neutrophil infiltrates (black arrows). Brain tissues (g-h) did not show any pathological signs although sporadic leukocyte infiltrates (black arrow) and enlargement of brain microvasculature (yellow arrow) was found in some animals. White adipose tissues (i-j) mostly displayed a healthy appearance with rare localized infiltrates (black arrows) in some but not all animals. Scale bars, 50µm, 100µm.



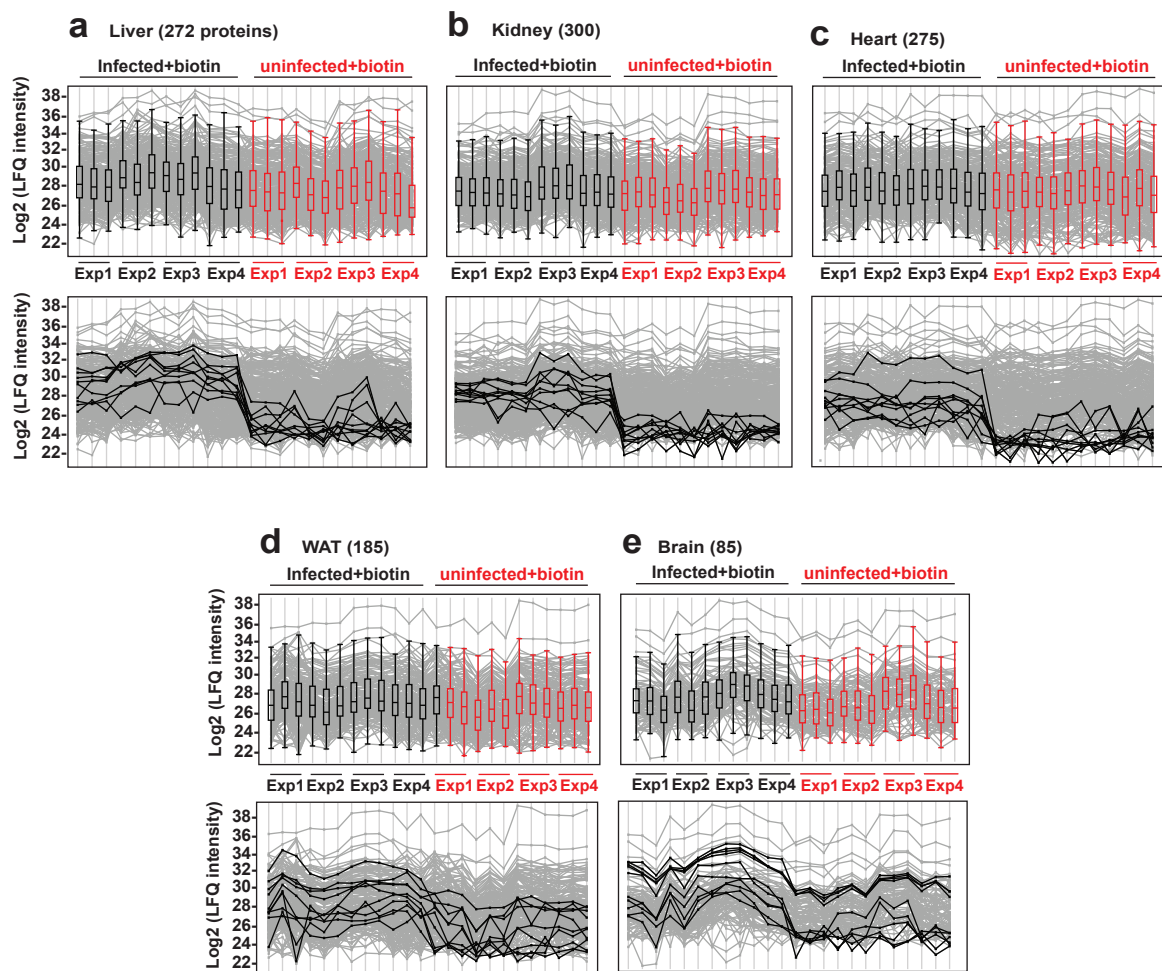

**Supplementary Figure 4. Profile plots of the label-free quantification (LFQ) normalized intensities of significant protein targets detected in the organ vasculatures.** Combined proteomics datasets of MRSA infected (n=12) and uninfected (n=12) biological replicates of liver (a), kidney (b), heart (c), WAT (d) and brain (e) show that the proteome changes detected by the method encompassed a broad dynamic range. There was a notable intrassay (within the same group) and interassay (within experiments) variability in the LFQ-values (4a-e, upper panels). However, plotting the top 10 differential proteins identified in each tissue makes evident that the changes during infection largely exceed the experimental error since the method is still capable of differentiating between infected and uninfected samples (4a-e, lower panels).

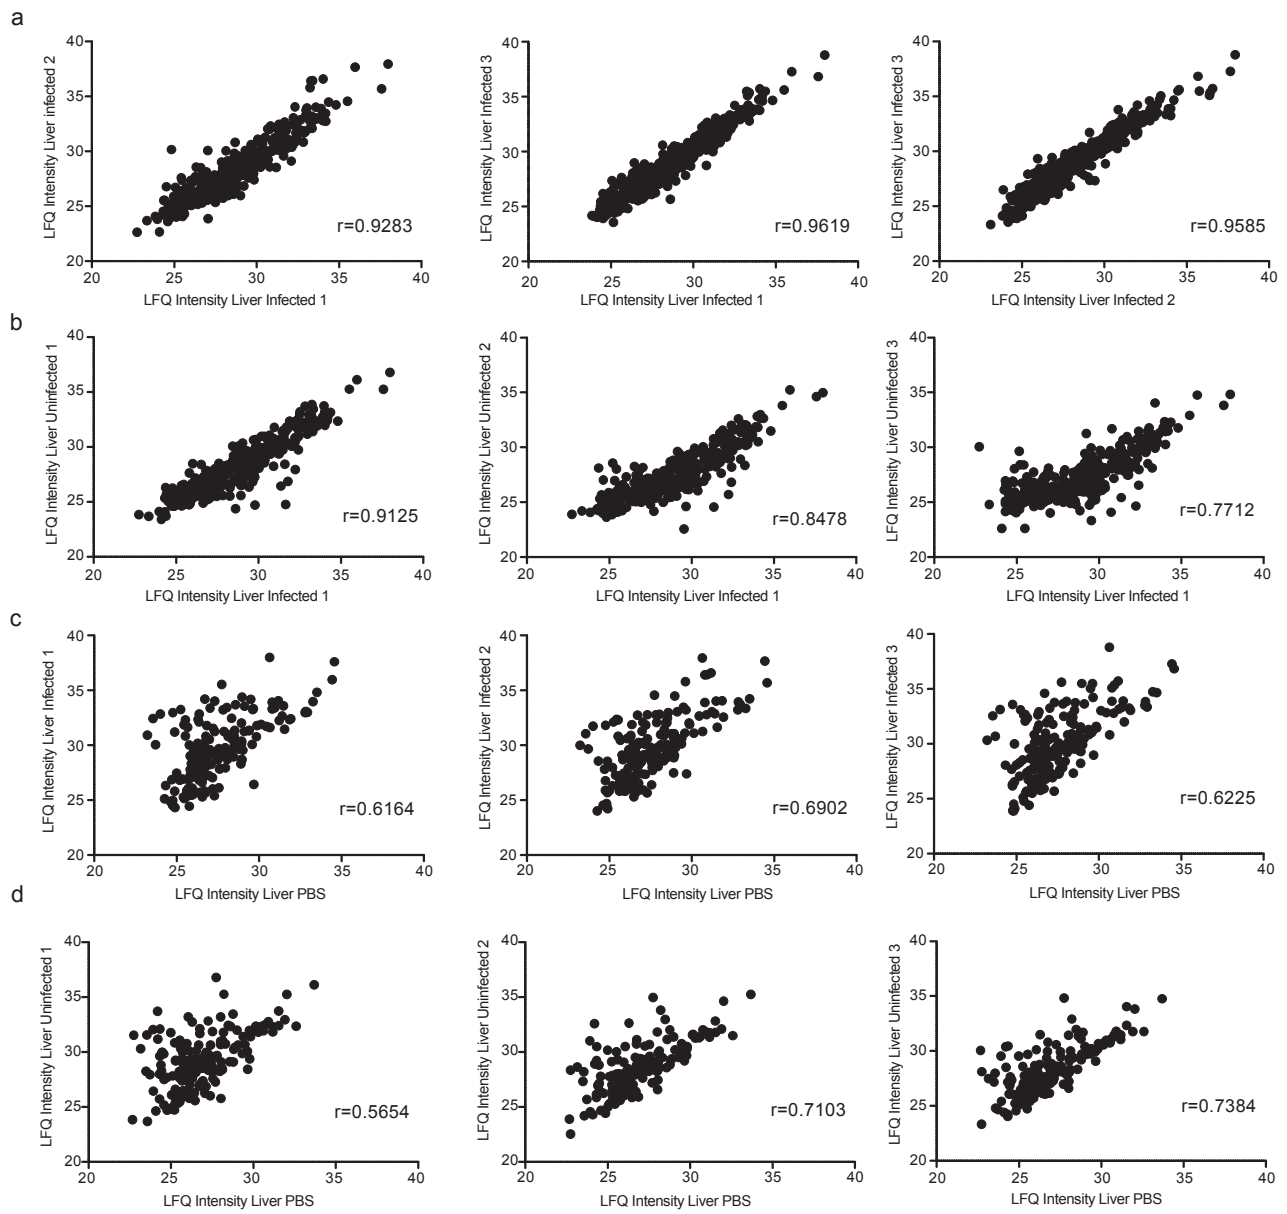

**Supplementary Figure 5. Multiple correlation plots of the label-free quantification intensities across liver samples analyzed in the same individual experiment.** Pearson correlation coefficients were derived from the plots and compared across biological replicates of infected, uninfected and PBS-control liver tissues. Infected replicates (a) showed high Pearson correlation coefficients, whereas correlations were decreases when comparing infected vs uninfected (b). Even lower correlations were observed when comparing labeled samples with the PBS controls independently of their infection status (c-d).

# Supplementary Figure.6

**a**

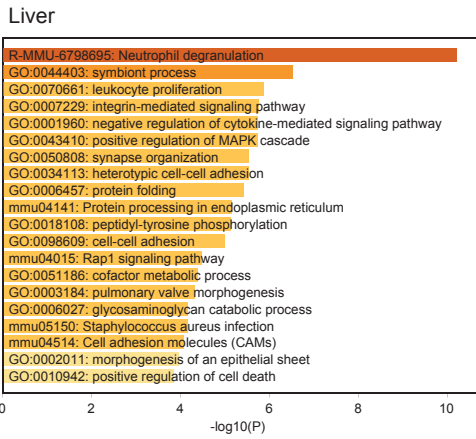

**b**

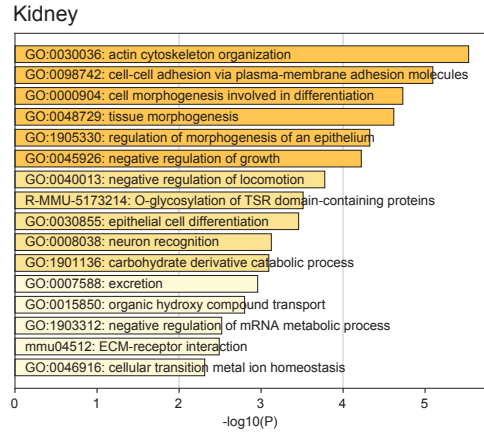

**c**

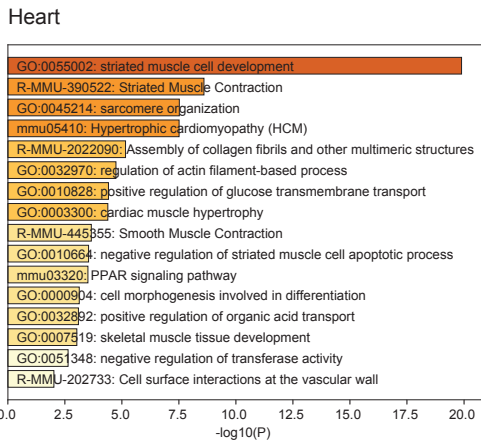

**d**

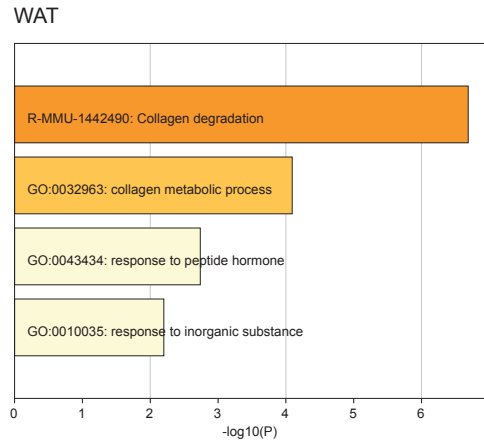

**e**

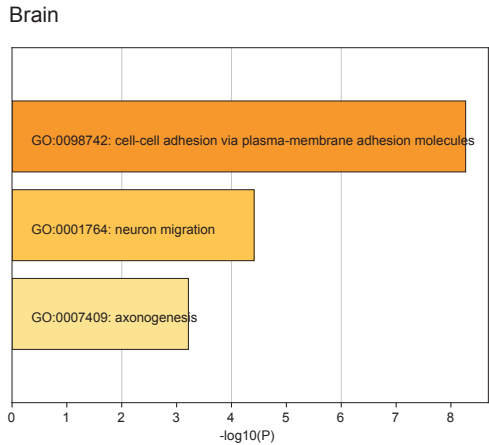

**Supplementary Figure 6. Proteomics and functional enrichment analysis of the vascular cell surface proteome identified multiple shared and organ-restricted biological pathways dysregulated during sepsis. All significantly changing proteins across liver (a), kidney (b), heart (c), brain (d) and white adipose tissue (WAT) (e) were analyzed by Metascape resulting in enrichment in particular biological pathways.**
